# Supplementary material for: Wastewater Surveillance Captured an Increase in Adenovirus Circulation in Milan (Italy) during the First Quarter of 2022
Source: MDPI journal article supplement (doi:10.3390/v14112351), 2022-10-26
Supplement: s1 [file s1]

**Table S1:** AdV-positivity rate by week in respiratory and fecal samples collected from inpatients with respiratory/gastroenteric infections in Fondazione IRCCS Ca' Granda Ospedale Maggiore Policlinico in Milan from week 2021-01 to week 2022-17, and quantification of AdV-DNA (cg/L/day) in urban wastewater samples collected in a wastewater treatment plant in Milan from week 2021-01 to week 2022-17. (ND: not determined.).

| ISO week | AdV positive rate (%) in respiratory samples | AdV positive rate (%) in gastrointestinal samples | AdV concentration (cg/L/day) |
|----------|----------------------------------------------|---------------------------------------------------|------------------------------|
| 2021-01  | 3.4%                                         | 0.0%                                              | ND                           |
| 2021-02  | 5.3%                                         | 0.0%                                              | 6.95E+11                     |
| 2021-03  | 2.3%                                         | 0.0%                                              | 1.38E+12                     |
| 2021-04  | 0.0%                                         | 0.0%                                              | 2.63E+12                     |
| 2021-05  | 5.9%                                         | 0.0%                                              | 1.62E+13                     |
| 2021-06  | 0.0%                                         | 0.0%                                              | 6.38E+11                     |
| 2021-07  | 2.2%                                         | 0.0%                                              | 7.62E+11                     |
| 2021-08  | 6.5%                                         | 0.0%                                              | 2.16E+13                     |
| 2021-09  | 2.6%                                         | 0.0%                                              | 2.31E+12                     |
| 2021-10  | 0.0%                                         | 0.0%                                              | 1.07E+13                     |
| 2021-11  | 0.0%                                         | 0.0%                                              | 1.85E+12                     |
| 2021-12  | 3.7%                                         | 0.0%                                              | 1.09E+13                     |
| 2021-13  | 0.0%                                         | 0.0%                                              | 2.03E+10                     |
| 2021-14  | 3.2%                                         | 0.0%                                              | 1.01E+12                     |
| 2021-15  | 14.3%                                        | 0.0%                                              | 2.09E+10                     |
| 2021-16  | 3.2%                                         | 0.0%                                              | ND                           |
| 2021-17  | 6.1%                                         | 0.0%                                              | ND                           |
| 2021-18  | 6.3%                                         | 0.0%                                              | ND                           |
| 2021-19  | 3.4%                                         | 0.0%                                              | ND                           |
| 2021-20  | 5.3%                                         | 0.0%                                              | ND                           |
| 2021-21  | 10.5%                                        | 0.0%                                              | ND                           |
| 2021-22  | 9.4%                                         | 0.0%                                              | ND                           |
| 2021-23  | 9.1%                                         | 0.0%                                              | 6.09E+11                     |
| 2021-24  | 3.4%                                         | 0.0%                                              | 5.84E+11                     |
| 2021-25  | 3.2%                                         | 0.0%                                              | 2.33E+10                     |
| 2021-26  | 20.7%                                        | 0.0%                                              | 2.33E+10                     |
| 2021-27  | 21.1%                                        | 0.0%                                              | 2.33E+10                     |
| 2021-28  | 13.8%                                        | 0.0%                                              | 2.33E+10                     |
| 2021-29  | 0.0%                                         | 0.0%                                              | 2.33E+10                     |
| 2021-30  | 3.2%                                         | 0.0%                                              | 2.33E+10                     |
| 2021-31  | 0.0%                                         | 0.0%                                              | 2.33E+10                     |

|                |       |       |          |
|----------------|-------|-------|----------|
| <b>2021-32</b> | 0.0%  | 0.0%  | ND       |
| <b>2021-33</b> | 6.7%  | 0.0%  | 1.92E+14 |
| <b>2021-34</b> | 7.7%  | 0.0%  | 6.13E+13 |
| <b>2021-35</b> | 0.0%  | 0.0%  | ND       |
| <b>2021-36</b> | 2.8%  | 0.0%  | ND       |
| <b>2021-37</b> | 0.0%  | 0.0%  | ND       |
| <b>2021-38</b> | 2.7%  | 0.0%  | ND       |
| <b>2021-39</b> | 0.0%  | 0.0%  | ND       |
| <b>2021-40</b> | 7.5%  | 0.0%  | 3.99E+13 |
| <b>2021-41</b> | 2.2%  | 0.0%  | 1.50E+13 |
| <b>2021-42</b> | 1.9%  | 15.4% | 3.23E+13 |
| <b>2021-43</b> | 1.5%  | 5.0%  | 1.72E+13 |
| <b>2021-44</b> | 16.4% | 50.0% | 1.05E+14 |
| <b>2021-45</b> | 8.1%  | 6.7%  | 4.12E+13 |
| <b>2021-46</b> | 3.4%  | 0.0%  | 2.41E+13 |
| <b>2021-47</b> | 2.6%  | 0.0%  | 3.55E+10 |
| <b>2021-48</b> | 2.3%  | 0.0%  | 2.92E+13 |
| <b>2021-49</b> | 22.7% | 0.0%  | 5.94E+13 |
| <b>2021-50</b> | 6.5%  | 0.0%  | 6.18E+13 |
| <b>2021-51</b> | 6.0%  | 0.0%  | 5.97E+12 |
| <b>2021-52</b> | 8.3%  | 0.0%  | 2.03E+13 |
| <b>2022-01</b> | 10.5% | 22.2% | 1.93E+13 |
| <b>2022-02</b> | 0.0%  | 0.0%  | 1.61E+13 |
| <b>2022-03</b> | 2.0%  | 0.0%  | ND       |
| <b>2022-04</b> | 7.5%  | 0.0%  | 4.84E+13 |
| <b>2022-05</b> | 3.0%  | 27.3% | 1.32E+13 |
| <b>2022-06</b> | 0.0%  | 0.0%  | 7.76E+13 |
| <b>2022-07</b> | 4.3%  | 0.0%  | 1.77E+14 |
| <b>2022-08</b> | 14.7% | 6.7%  | 1.20E+14 |
| <b>2022-09</b> | 7.5%  | 5.3%  | 9.79E+13 |
| <b>2022-10</b> | 12.9% | 31.6% | 7.99E+14 |
| <b>2022-11</b> | 4.3%  | 14.3% | 6.56E+14 |
| <b>2022-12</b> | 7.1%  | 22.7% | 3.29E+14 |
| <b>2022-13</b> | 9.0%  | 4.3%  | 6.39E+13 |
| <b>2022-14</b> | 8.1%  | 12.5% | 1.36E+14 |
| <b>2022-15</b> | 7.0%  | 6.7%  | 8.87E+13 |
| <b>2022-16</b> | 5.7%  | 9.5%  | 1.79E+14 |
